# Supplementary material for: Cysteamine Decreases Low‐Density Lipoprotein Oxidation, Causes Regression of Atherosclerosis, and Improves Liver and Muscle Function in Low‐Density Lipoprotein Receptor–Deficient Mice
Source: PubMed Central journal article supplement — J Am Heart Assoc. 2021 Sep 13;10(18):e017524. doi: 10.1161/JAHA.120.017524 (PMC8649511; doi:10.1161/jaha.120.017524), 2021-09-13
Supplement: JAH3-10-e017524-s001.pdf [file JAH3-10-e017524-s001.pdf]

# **SUPPLEMENTAL MATERIAL**

**Table S1. Primer sequences for hepatic qPCR.**

| <b>Gene</b>   | <b>Primer Forward</b>    | <b>Primer Reverse</b>        |
|---------------|--------------------------|------------------------------|
| <i>Cyp27</i>  | CATCTTCTCAAATTCGAGTGACAA | TGGGAGTAGACAAGGTACAACCC      |
| <i>Cyp7a1</i> | CATTACAGAGTGCTGGCCAAGA   | CGCAGAGCCTCCTTGATGAT         |
| <i>Acat2</i>  | ACCAATTCCAGCCATAAAGCA    | GGTTTAATCCAAGTTCTTTAGCTATTGC |
| <i>Cd68</i>   | TGACCTGCTCTCTCTAAGGCTACA | TCACGGTTGCAAGAGAAACATG       |
| <i>IL18</i>   | GACTCTTGCGTCAACTTCAAGG   | CAGGCTGTCTTTTGTCAACGA        |
| <i>Tnfa</i>   | CATCTTCTCAAATTCGAGTGACAA | TGGGAGTAGACAAGGTACAACCC      |
| <i>Ccl5</i>   | GGAGTATTTCTACACCAGCAGCAA | GCGGTTCCCTTCGAGTGACA         |
| <i>Ccl2</i>   | GCTGGAGAGCTACAAGAGGATCA  | TCTCTTTGAGCTTGGTGACAAAA      |
| <i>Saa1</i>   | GGCTGCTGAGAAAATCAGTGATG  | TCAGCAATGGTGTCTCATGTC        |
